# Supplementary material
Source: publisher figshare collection journal article supplement (https://gsajournals.figshare.com/ndownloader/files/30612639)
Supplement: Supplementary file 1 [file 30612639]

## Sheet: Sheet1
Supplementary Table 4. Comparison between RepeatMasker and RepeatExplorer outputs for the G. anomalum genome
	Repeat Masker				Repeat Explorer
Element type	Fragments	Copies	SoloLTR	Total Mbp	Total Mbp
DNA	13383	8152	-	12.51	4.734
DNA/CMC-EnSpm	3	3	-	0	-
DNA/EnSpmCACTA	1660	983	-	2.75	-
DNA/Harbinger	4	2	-	0	-
DNA/hAT	1462	936	-	0.69	0.189
DNA/hAT-Tip100	20	12	-	0.02	-
DNA/L1	1009	503	-	1.16	-
DNA/MarinerTc1	87	49	-	0.06	-
DNA/MuDR	9138	5664	-	7.82	4.545
LTR	693041	383488	211824	557.51	615.474
LTR	35	34	-	0	21.87
LTR/Copia	48948	29393	10230	47.72	29.07
LTR/Gypsy	644058	354061	201594	509.79	564.534
Unknown	-	-	-	-	6.894
Total	706424	391640	-	570.0 (42%)	627.1 (46%)
